# Supplementary material for: Feedbacks between earlywood anatomy and non-structural carbohydrates affect spring phenology and wood production in ring-porous oaks
Source: Copernicus journal article supplement (doi:10.5194/bg-2016-227), 2016-05-26

Table 1: Correlation coefficients ( $P$ -values) between stem diameter and tree height.

|                     | Hyperhumid site     | Humid site          | Subhumid site       |
|---------------------|---------------------|---------------------|---------------------|
| <i>Q. robur</i>     | 0.473 ( $P=0.002$ ) | 0.160 ( $P=0.323$ ) | 0.685 ( $P<0.001$ ) |
| <i>Q. pyrenaica</i> | 0.581 ( $P<0.001$ ) | 0.175 ( $P=0.279$ ) | 0.461 ( $P=0.003$ ) |

Figure 1: Stem diameter versus tree height (blue dots) at the hyperhumid, humid, and subhumid sites for *Q. robur* and *Q. pyrenaica*. Regression lines are shown in red.

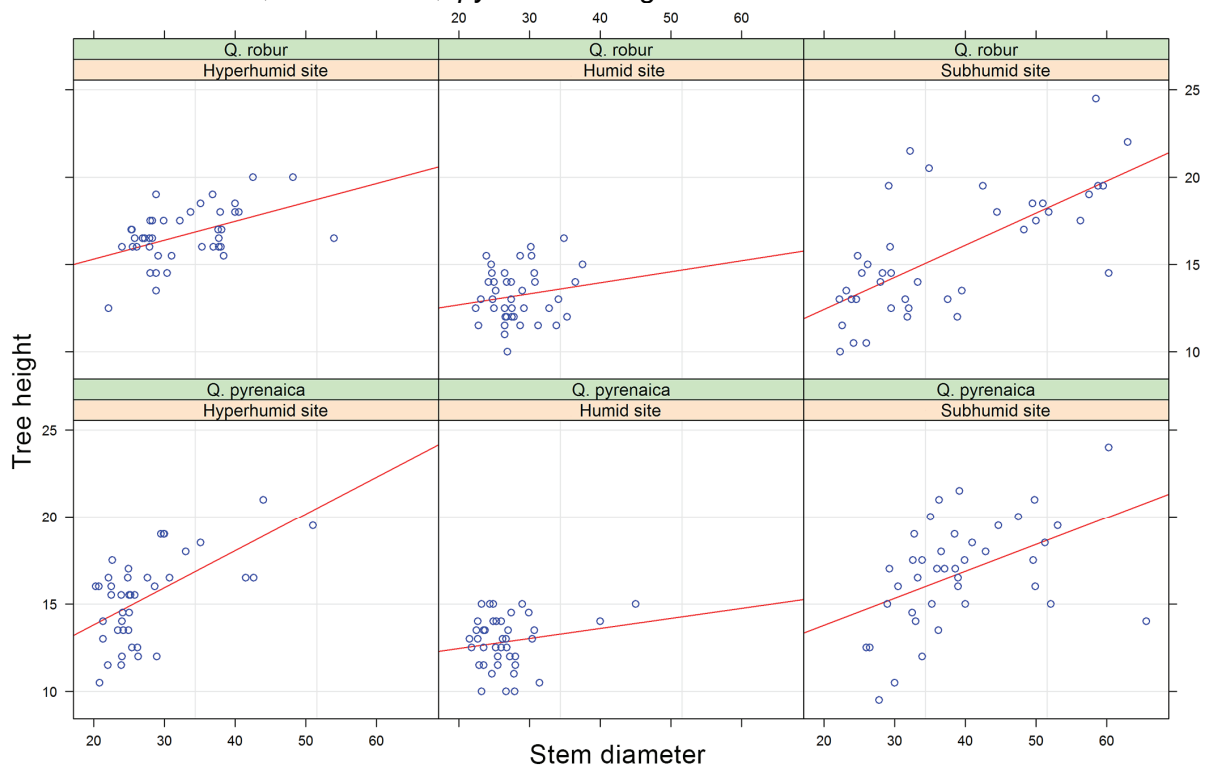

Supplement: Supplementary file [file bg-2016-227-AC1-supplement.pdf]
