# Supplementary material for: Feedbacks between earlywood anatomy and non-structural carbohydrates affect spring phenology and wood production in ring-porous oaks
Source: Copernicus journal article supplement (doi:10.5194/bg-2016-227), 2016-05-26

Figure 1: Transverse section of a wood core of *Q. pyrenaica* showing the colour boundary between heartwood and sapwood.

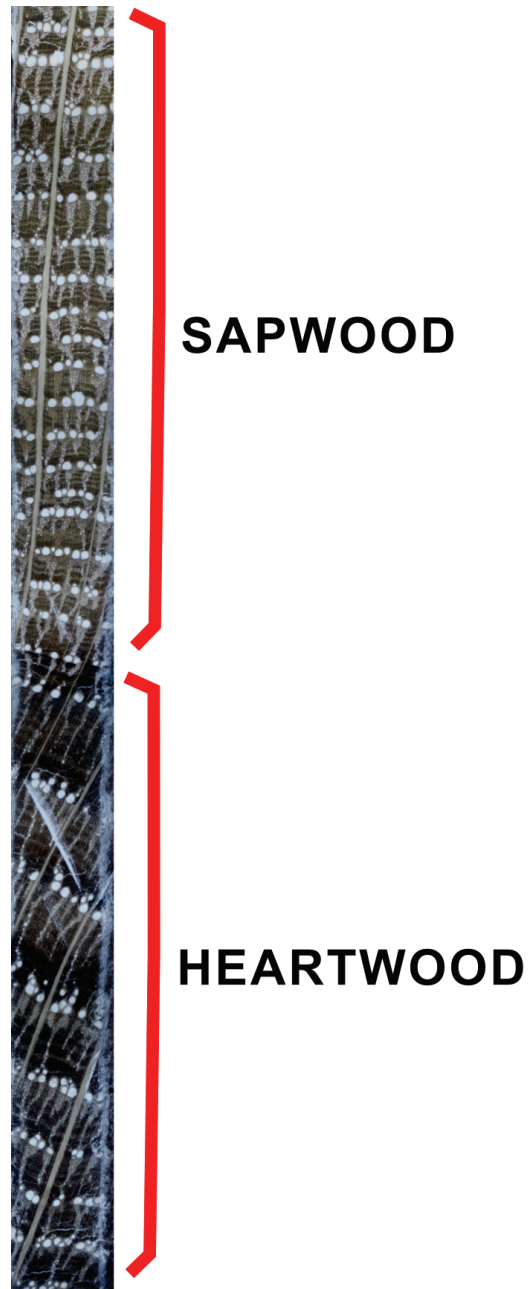

Supplement: Supplementary file [file bg-2016-227-AC2-supplement.pdf]
